# Supplementary material for: Single-molecule dynamics of the P granule scaffold MEG-3 in the Caenorhabditis elegans zygote
Source: PubMed Central journal article supplement — Mol Biol Cell. 2019 Feb 1;30(3):333–45. doi: 10.1091/mbc.E18-06-0402 (PMC6589573; doi:10.1091/mbc.e18-06-0402), 2019-02-01
Supplement: mbc-30-333-s001.pdf [file mbc-30-333-s001.pdf]

# Supplemental Materials

*Molecular Biology of the Cell*

Wu et al.

MovieS1

near-TIRF imaging of PGL-1::GFP

MovieS2

near-TIRF imaging of MEG-3::Halo and PGL-1::GFP

MovieS3

near-TIRF imaging of Meg-3::meGFP

MovieS4

Spinning disk imaging of MEG-3::Halo and PGL-1::GFP

MovieS5

near-TIRF imaging of Meg-3::meGFP and PGL-1::GFP in an mbk-2(RNAi) embryo

MovieS6

near-TIRF imaging of Meg-3::meGFP and PGL-1::GFP in an mex-5/6(RNAi) embryo

MovieS7

near-TIRF imaging of Meg-3::meGFP and PGL-1::GFP in an mex-5(T186A);mex-6(RNAi) embryo

MovieS8

near-TIRF imaging of Meg-3::meGFP and PGL-1::GFP in an plk-1(RNAi) embryo

MovieS9

near-TIRF imaging of Meg-3::meGFP and PGL-1::GFP embryos. FD to PG transition

MovieS10

near-TIRF imaging of Meg-3::meGFP and PGL-1::GFP embryos. FD to PG to SD transition

MovieS11

near-TIRF imaging of Meg-3::meGFP and PGL-1::GFP embryos. SD to PG transition

MovieS12

near-TIRF imaging of Meg-3::meGFP and PGL-1::GFP embryos. SD to PG to SD transition.
